# Supplementary material
Source: bioRxiv or medRxiv preprint supplement (http://medrxiv.stage.highwire.org/highwire/filestream/95459/field_highwire_adjunct_files/0/2020.09.03.20187195-1.pdf)
Supplement: Supplementary file [file 2020.09.03.20187195-1.pdf]

# Supplementary Figure 1

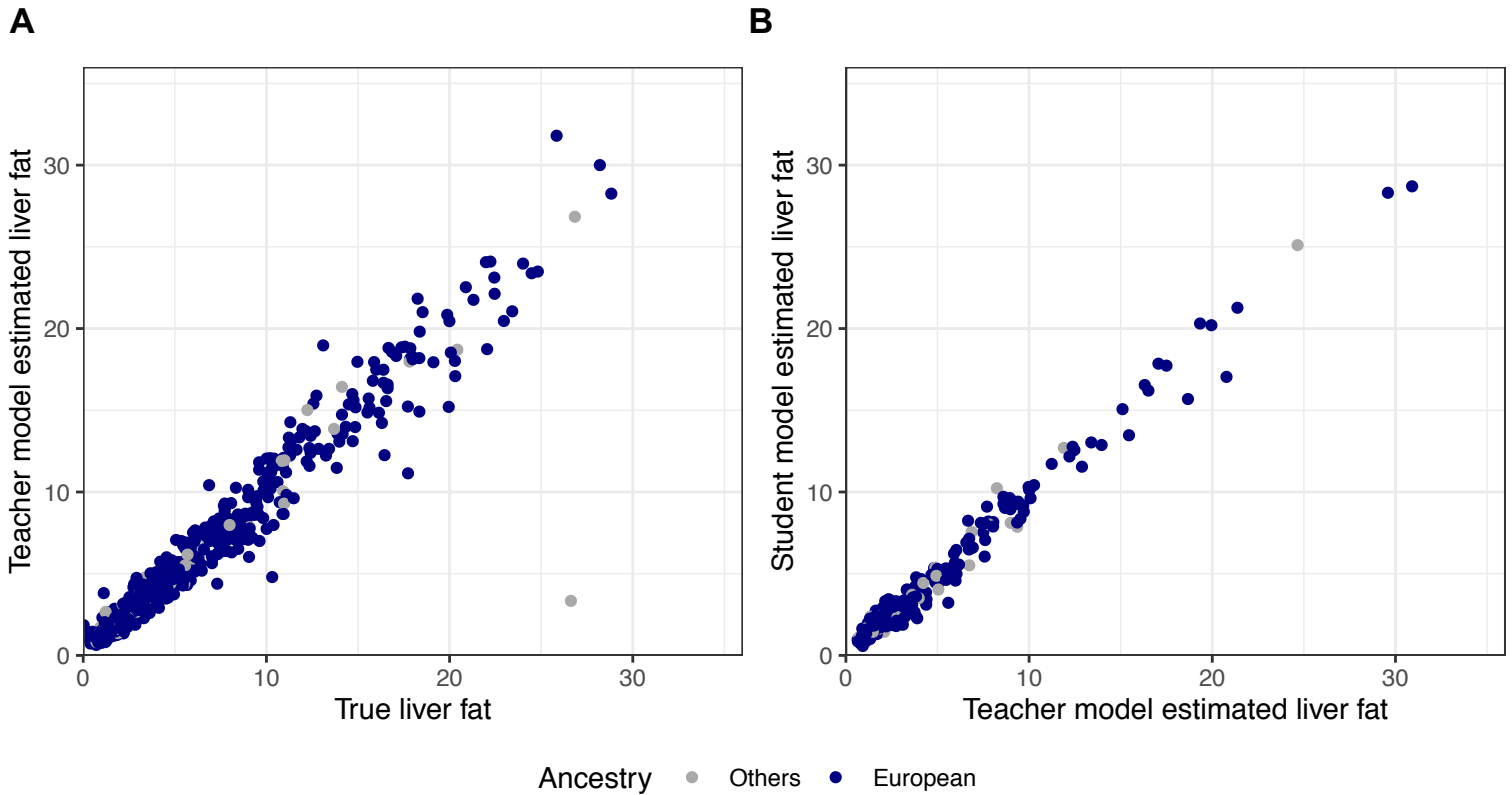

**Supplemental Figure 1. Comparison of truth data with teacher-model inferences, and teacher-model inferences with student-model inferences. A)** In a held-out set of 1,214 participants with truth data, the Pearson correlation between the previously-quantified liver fat ('True liver fat') and liver fat inferred from the ML teacher model was 0.974 (95% CI 0.971-0.977;  $P < 2.4 \times 10^{-784}$ ). **B)** In a separate held-out set of 390 samples with both gradient-echo and IDEAL imaging who were not used for model creation, the Pearson correlation between the teacher model inferred liver fat and the student model inferred liver fat was 0.992 (95% CI 0.990-0.993;  $P = 3.1 \times 10^{-351}$ ). Blue points indicate European ancestries (whether the sample was included in the GWAS, as defined in the methods), gray points indicate all other ancestries.

## Supplementary Figure 2

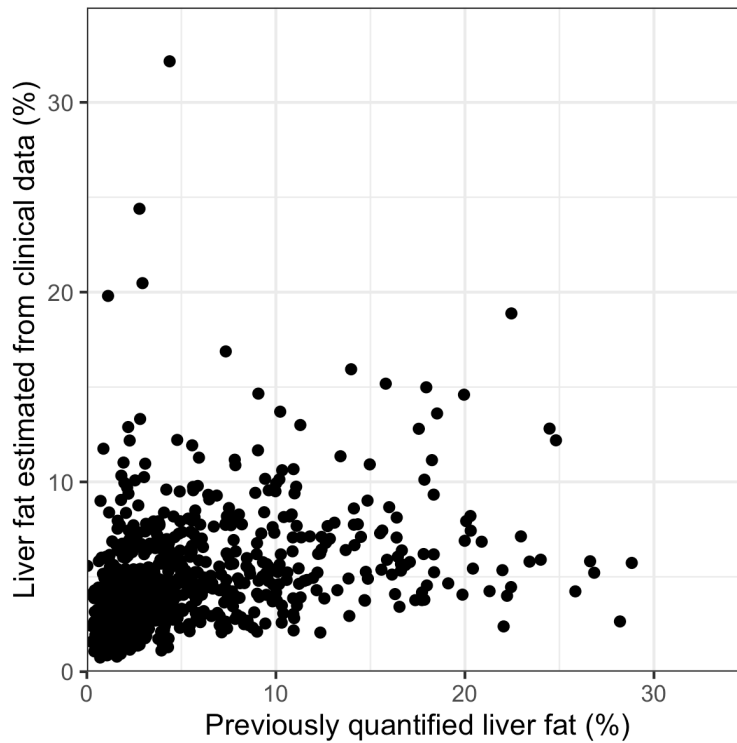

**Supplemental Figure 2. Prediction of liver fat using a variable beta regression model of clinical and anthropometric measurements.** In a held-out set of 1,196 participants of all ancestries with truth data, the Pearson correlation between the previously-quantified liver fat and liver fat estimated from clinical data was 0.453 (95% CI 0.407-0.497;  $P=9.9 \times 10^{-62}$ ). Measurements that were at least nominally associated with liver fat in univariable analysis and therefore included in the beta regression model were: BMI, waist circumference, hip circumference, total body fat mass, total body fat percent, age at baseline, sex, height, weight, trunk fat mass, trunk fat percent, WHR, LDL cholesterol, total cholesterol, HDL cholesterol, triglycerides, systolic blood pressure, alkaline phosphatase, alanine aminotransferase (ALT), aspartate aminotransferase (AST), ALT/AST, gamma glutamyltransferase, hemoglobin A1c, random glucose, and C-reactive protein. Lipid measures were adjusted for lipid-lowering medication use and blood pressure was adjusted for anti-hypertensive medication use, as previously described ((Ehret et al., 2016; Patel et al., 2020).

**Supplemental Table 1. Baseline characteristics of participants in UK Biobank who underwent abdominal imaging.**

|                                    | <b>Overall<br/>(N=36,703)</b> |
|------------------------------------|-------------------------------|
| Female                             | 19049 (51.9%)                 |
| Age at enrollment, years           | 54.9 (7.47)                   |
| Age at imaging, years              | 64.2 (7.56)                   |
| Race                               |                               |
| White                              | 35572 (96.9%)                 |
| Black                              | 214 (0.6%)                    |
| South Asian                        | 313 (0.9%)                    |
| Other Asian                        | 165 (0.4%)                    |
| Multiple or other                  | 336 (0.9%)                    |
| Coronary artery disease            | 1283 (3.5%)                   |
| Diabetes                           | 1956 (5.3%)                   |
| Obese or severely obese            | 6495 (17.7%)                  |
| Hypertension                       | 11085 (30.2%)                 |
| Excessive alcohol intake           | 2015 (5.5%)                   |
| Medications                        |                               |
| Blood pressure medications         | 4940 (13.5%)                  |
| Lipid-lowering therapy             | 5552 (15.1%)                  |
| Anthropometric data                |                               |
| Weight, kg                         | 76.8 (14.8)                   |
| Waist-to-hip ratio                 | 0.859 (0.0871)                |
| Body mass index, kg/m <sup>2</sup> | 26.6 (4.19)                   |
| Body fat, %                        | 30.0 (8.17)                   |
| Systolic blood pressure            | 135 (17.6)                    |
| Weekly drinks, American standard   | 5.48 (6.37)                   |
| Liver-associated biomarkers        |                               |
| Alanine aminotransferase (IU/L)    | 23.0 (13.9)                   |
| Aspartate aminotransferase (IU/L)  | 25.8 (10.5)                   |
| Gamma glutamyltransferase (IU/L)   | 33.7 (33.9)                   |
| Lipid biomarkers                   |                               |
| Total cholesterol, mg/dl           | 221 (42.0)                    |
| LDL cholesterol, mg/dl             | 138 (32.1)                    |
| HDL cholesterol, mg/dL             | 57.0 (14.5)                   |
| Triglycerides, mg/dL               | 123 [88-179]                  |
| Glycemic biomarkers                |                               |
| Glycated hemoglobin, %             | 5.36 (0.475)                  |
| Glucose, mg/dL                     | 89.9 (17.5)                   |
| Liver fat at imaging, %            | 2.22 [1.57-4.17]              |

Values correspond to number (%), mean (standard deviation), or median [interquartile range].

**Supplementary Table 2. Definitions of disease in each cohort.**

| Cohort                       | Disease                  | Definition                                                                                                                                                                                                                                                                                                                                                                                                                                                                                                                                                                                                                                                                                                                                                                                                                                                                                                                                                                                                                                                                                      |
|------------------------------|--------------------------|-------------------------------------------------------------------------------------------------------------------------------------------------------------------------------------------------------------------------------------------------------------------------------------------------------------------------------------------------------------------------------------------------------------------------------------------------------------------------------------------------------------------------------------------------------------------------------------------------------------------------------------------------------------------------------------------------------------------------------------------------------------------------------------------------------------------------------------------------------------------------------------------------------------------------------------------------------------------------------------------------------------------------------------------------------------------------------------------------|
| UK Biobank                   | NAFLD                    | Hospitalization due to nonalcoholic fatty liver (ICD10 K76.0) or other specified inflammatory liver diseases including nonalcoholic steatohepatitis (ICD10 K75.8)                                                                                                                                                                                                                                                                                                                                                                                                                                                                                                                                                                                                                                                                                                                                                                                                                                                                                                                               |
| UK Biobank                   | NASH                     | Hospitalization due to other specified inflammatory liver diseases including nonalcoholic steatohepatitis (ICD10 K75.8)                                                                                                                                                                                                                                                                                                                                                                                                                                                                                                                                                                                                                                                                                                                                                                                                                                                                                                                                                                         |
| UK Biobank                   | NAFLD/NASH               | Hospitalization due to nonalcoholic fatty liver (ICD10 K76.0) or other specified inflammatory liver diseases including nonalcoholic steatohepatitis (ICD10 K75.8)                                                                                                                                                                                                                                                                                                                                                                                                                                                                                                                                                                                                                                                                                                                                                                                                                                                                                                                               |
| UK Biobank                   | Cirrhosis                | Hospitalization or death due to (ICD10; ICD9 codes): cirrhosis (K74.6; 5715), alcoholic cirrhosis or liver damage (K70.3; 5712, 5713), oesophageal varices (I85.0,I85.9; 4560, 4561) or portal hypertension (K76.6; 5723)                                                                                                                                                                                                                                                                                                                                                                                                                                                                                                                                                                                                                                                                                                                                                                                                                                                                       |
| UK Biobank                   | Hepatocellular Carcinoma | Hospitalization due to liver cell carcinoma (ICD10 C22.0)                                                                                                                                                                                                                                                                                                                                                                                                                                                                                                                                                                                                                                                                                                                                                                                                                                                                                                                                                                                                                                       |
| UK Biobank                   | Coronary Artery Disease  | Self report of heart attack diagnosed by doctor (df-6150), self-reported myocardial infarction, coronary angioplasty or coronary artery bypass graft or triple heart bypass during verbal interview with trained nurse (df-20002, df-20004), hospitalization or death due to myocardial infarction (ICD10 I21, I21.0-4, I21.9, I22, I22.0, I22.1, I22.8, I22.9, I23, I23.0-6, I23.8; ICD9 410, 4109, 412, 4129), ischemic heart disease ICD10 (I24, I24.0, I24.1, I24.8, I24.9, I25.2; ICD9 411, 4119); operative procedures: replacement of coronary artery(ies)(K40, K40.1-4, K40.8-9, K41, K41.1-4, K41.8-9, K42,K42.1-4,K42.8-9, K43, K43.1-4, K43.8-9, K44, K44.1-4, K44.8-9), connection of thoracic artery to coronary artery (K45.1-K45.6, K45.8-9), other bypass of coronary artery(ies) (K46, K46.1-K46.6, K46.8-9) percutaneous transluminal balloon angioplasty of coronary artery(ies) (K49.1-4,K49.8-9), transluminal operations on coronary artery (K50.1-2, K50.4), percutaneous transluminal balloon angioplasty and insertion of stent into coronary artery (K75.1-4,K75.8-9) |
| UK Biobank                   | Diabetes                 | Self report of diabetes diagnosed by doctor (df-2443), self-reported diabetes during verbal interview with trained nurse (df-20002), started insulin within one year diagnosis of diabetes, self-reported insulin medication, hospitalization or death due to diabetes (ICD10 E10, E10.0-9, E11, E11.0-9, E12, E12.1, E12.8, E12.9, E13, E13.1-9, E14, E14.0-9; ICD9 2500, 25001, 25009, 2501, 25011, 25019, 2503, 2504, 2505, 25099)                                                                                                                                                                                                                                                                                                                                                                                                                                                                                                                                                                                                                                                           |
| UK Biobank                   | Hypertension             | Self-report of high blood pressure diagnosed by doctor (df-6150), self-reported hypertension, or essential hypertension during verbal interview with trained nurse (df-20002); hospitalization or death due to (ICD10; ICD9 codes) essential hypertension (I10; 401, 4010, 4011, 4019), hypertensive heart disease (I11, I11.0, I11.9, I13, I13.0-13.2; 402, 4020, 4021, 4029, 404, 4040, 4041, 4049), hypertensive renal disease (I12, I12.0, I12.9, I13, I13.0-13.2; 403, 4030, 4031, 4039, 404, 4040, 4041, 4049), secondary hypertension or renovascular hypertension (I15, I15.0-15.2, I15.8, I15.9; 405, 4050, 4051, 4059)                                                                                                                                                                                                                                                                                                                                                                                                                                                                |
| Mass General Brigham Biobank | NAFLD/NASH               | Hospitalization due to nonalcoholic fatty liver (ICD10 K76.0) or nonalcoholic steatohepatitis (ICD10 K75.81)                                                                                                                                                                                                                                                                                                                                                                                                                                                                                                                                                                                                                                                                                                                                                                                                                                                                                                                                                                                    |

**Supplementary Table 3. Effects of variants previously associated with quantitative liver fat in common variant association study, and cirrhosis-associated variants nominated to affect liver fat, on liver fat in 32,976 individuals in UK Biobank.**

| Variant    | Chr. | Position (hg19) | Effect Allele | Other Allele | Allele Freq. | Effect on liver fat (SD) | P value  | Locus              | Previous reference(s)                                                      |
|------------|------|-----------------|---------------|--------------|--------------|--------------------------|----------|--------------------|----------------------------------------------------------------------------|
| rs1260326  | 2    | 27730940        | T             | C            | 0.39         | 0.04                     | 4.10E-07 | <i>GCKR</i>        | (Palmer et al., 2013; Parisinos et al., 2020)                              |
| rs780094   | 2    | 27741237        | T             | C            | 0.38         | 0.04                     | 3.50E-06 | <i>GCKR</i>        | (Speliotes et al., 2011; Palmer et al., 2013)                              |
| rs2228603  | 19   | 19329924        | C             | T            | 0.92         | -0.22                    | 1.80E-51 | <i>NCAN</i>        | (Speliotes et al., 2011; Palmer et al., 2013)                              |
| rs12137855 | 1    | 219448378       | C             | T            | 0.79         | 0.01                     | 0.46     | <i>LYPLAL1</i>     | (Speliotes et al., 2011; Palmer et al., 2013)                              |
| rs4240624  | 8    | 9184231         | G             | A            | 0.09         | -0.02                    | 0.10     | <i>PPP1R3B</i>     | (Speliotes et al., 2011; Palmer et al., 2013)                              |
| rs641738   | 19   | 54676763        | C             | T            | 0.56         | -0.03                    | 8.80E-06 | <i>MBOAT7-TMC4</i> | (Buch et al., 2015; Mancina et al., 2016)                                  |
| rs62305723 | 4    | 88231429        | G             | A            | 0.93         | 0.01                     | 0.59     | <i>HSD17B13</i>    | (Ma et al., 2019)                                                          |
| rs6834314  | 4    | 88213808        | A             | G            | 0.72         | 0.01                     | 0.32     | <i>HSD17B13</i>    | (Abul-Husn et al., 2018; Ma et al., 2019; Gellert-Kristensen et al., 2020) |
| rs72613567 | 4    | 88231392        | T             | TA           | 0.73         | 0.01                     | 0.40     | <i>HSD17B13</i>    | (Abul-Husn et al., 2018; Ma et al., 2019; Gellert-Kristensen et al., 2020) |
| rs11597086 | 10   | 101953705       | A             | C            | 0.55         | 0.02                     | 0.01     | <i>CHUK</i>        | (Feitosa et al., 2013)                                                     |
| rs10883451 | 10   | 101924418       | T             | C            | 0.50         | 0.02                     | 0.02     | <i>ERLIN1</i>      | (Feitosa et al., 2013)                                                     |

Effects on inverse-normal transformed liver fat are given in units of standard deviation (SD).

**Supplementary Table 4. Effects of CVAS top variants after adjusting for alcohol consumption.**

| Lead Variant                        | Chr. | Position (hg19) | Nearest Gene  | Effect Allele | Other Allele | Effect Allele Freq. | Unadjusted for alcohol consumption (original CVAS, n=32976) |         |          | Former and excessive alcohol consumers excluded (n=30197) |         |          | Former alcohol consumers excluded, adjusted for number of weekly drinks (n=32043) |         |          |
|-------------------------------------|------|-----------------|---------------|---------------|--------------|---------------------|-------------------------------------------------------------|---------|----------|-----------------------------------------------------------|---------|----------|-----------------------------------------------------------------------------------|---------|----------|
|                                     |      |                 |               |               |              |                     | Effect on liver fat (SD)                                    | SE (SD) | P value  | Effect on liver fat (SD)                                  | SE (SD) | P value  | Effect on liver fat (SD)                                                          | SE (SD) | P value  |
| <b>Newly-Identified Variants</b>    |      |                 |               |               |              |                     |                                                             |         |          |                                                           |         |          |                                                                                   |         |          |
| rs2642438                           | 1    | 220970028       | <i>MARC1</i>  | G             | A            | 0.70                | 0.052                                                       | 0.008   | 1.70E-09 | 0.046                                                     | 0.009   | 4.20E-07 | 0.050                                                                             | 0.009   | 8.70E-09 |
| rs1229984                           | 4    | 100239319       | <i>ADH1B</i>  | C             | T            | 0.98                | 0.158                                                       | 0.025   | 7.00E-10 | 0.147                                                     | 0.026   | 1.40E-08 | 0.153                                                                             | 0.026   | 3.40E-09 |
| rs112875651                         | 8    | 126506694       | <i>TRIB1</i>  | G             | A            | 0.61                | 0.050                                                       | 0.008   | 3.80E-10 | 0.052                                                     | 0.008   | 3.50E-10 | 0.053                                                                             | 0.008   | 3.70E-11 |
| rs2250802                           | 10   | 113921354       | <i>GPAM</i>   | G             | A            | 0.27                | 0.054                                                       | 0.009   | 1.40E-09 | 0.056                                                     | 0.009   | 2.10E-09 | 0.056                                                                             | 0.009   | 3.70E-10 |
| rs56252442                          | 19   | 18229208        | <i>MAST3</i>  | T             | G            | 0.25                | 0.049                                                       | 0.009   | 2.70E-08 | 0.051                                                     | 0.009   | 3.20E-08 | 0.050                                                                             | 0.009   | 1.70E-08 |
| <b>Previously-Reported Variants</b> |      |                 |               |               |              |                     |                                                             |         |          |                                                           |         |          |                                                                                   |         |          |
| rs58542926                          | 19   | 19379549        | <i>TM6SF2</i> | T             | C            | 0.07                | 0.289                                                       | 0.015   | 2.80E-85 | 0.283                                                     | 0.015   | 1.60E-75 | 0.288                                                                             | 0.015   | 6.10E-83 |
| rs429358                            | 19   | 45411941        | <i>APOE</i>   | T             | C            | 0.85                | 0.121                                                       | 0.011   | 1.50E-29 | 0.114                                                     | 0.011   | 4.80E-24 | 0.120                                                                             | 0.011   | 3.90E-28 |
| rs738408                            | 22   | 44324730        | <i>PNPLA3</i> | T             | C            | 0.21                | 0.195                                                       | 0.009   | 5.30E-95 | 0.191                                                     | 0.010   | 3.10E-84 | 0.194                                                                             | 0.010   | 1.10E-92 |

Excessive alcohol consumption was defined as >14 weekly drinks for women and >21 weekly drinkers for men. Chr., chromosome; Freq., frequency; SD, standard deviation; SE, standard error.

**Supplementary Table 5. Replication of eight loci associated with liver fat in the discovery CVAS of liver fat in UK Biobank in two additional cohorts.**

|                                       |      |                 |              |               |              | UK Biobank Discovery CVAS |                              |         |          | Framingham Heart Study Replication |              |               |                             |         |          | MESA Replication |                             |         |          | Combined Framingham + MESA Replication |         |          |
|---------------------------------------|------|-----------------|--------------|---------------|--------------|---------------------------|------------------------------|---------|----------|------------------------------------|--------------|---------------|-----------------------------|---------|----------|------------------|-----------------------------|---------|----------|----------------------------------------|---------|----------|
| Lead Variant                          | Chr. | Position (hg19) | Nearest Gene | Effect Allele | Other Allele | Effect Allele             | Effect on MRI liver fat (SD) | SE (SD) | P value  | Effect Allele                      | Other Allele | Effect Allele | Effect on CT liver fat (SD) | SE (SD) | P value  | Effect Allele    | Effect on CT liver fat (SD) | SE (SD) | P value  | Effect on CT liver fat (SD)            | SE (SD) | P value  |
|                                       |      |                 |              |               |              | Freq.                     |                              |         |          | Freq.                              |              |               |                             | Freq.   |          |                  |                             | Freq.   |          |                                        |         |          |
| <b>Newly-identified variants</b>      |      |                 |              |               |              |                           |                              |         |          |                                    |              |               |                             |         |          |                  |                             |         |          |                                        |         |          |
| rs2642438                             | 1    | 220970028       | MARC1        | G             | A            | 0.70                      | 0.052                        | 0.008   | 1.70E-09 | G                                  | A            | 0.71          | 0.088                       | 0.028   | 1.60E-03 | G                | 0.062                       | 0.026   | 0.017    | 0.074                                  | 0.019   | 1.04E-04 |
| rs1229984                             | 4    | 100239319       | ADH1B        | C             | T            | 0.98                      | 0.158                        | 0.025   | 7.00E-10 | C                                  | T            | 0.95          | 0.101                       | 0.057   | 0.081    | C                | 0.034                       | 0.040   | 0.394    | 0.056                                  | 0.033   | 0.088    |
| rs112875651                           | 8    | 126506694       | TRIB1        | G             | A            | 0.61                      | 0.050                        | 0.008   | 3.80E-10 | G                                  | A            | 0.60          | 0.070                       | 0.026   | 7.70E-03 | G                | 0.044                       | 0.023   | 0.059    | 0.055                                  | 0.017   | 1.40E-03 |
| rs2250802                             | 10   | 113921354       | GPAM         | G             | A            | 0.27                      | 0.054                        | 0.009   | 1.40E-09 | G                                  | A            | 0.30          | 0.058                       | 0.028   | 0.037    | G                | 0.031                       | 0.025   | 0.218    | 0.043                                  | 0.019   | 0.021    |
| rs56252442                            | 19   | 18229208        | MAST3        | T             | G            | 0.25                      | 0.049                        | 0.009   | 2.70E-08 | T                                  | G            | 0.19          | 0.065                       | 0.032   | 0.041    | T                | 0.017                       | 0.026   | 0.501    | 0.036                                  | 0.020   | 0.070    |
| <b>Previously-identified variants</b> |      |                 |              |               |              |                           |                              |         |          |                                    |              |               |                             |         |          |                  |                             |         |          |                                        |         |          |
| rs429358                              | 19   | 45411941        | APOE         | T             | C            | 0.85                      | 0.121                        | 0.011   | 1.50E-29 | T                                  | C            | 0.97          | -0.119                      | 0.075   | 0.110    | T                | 0.056                       | 0.029   | 0.054    | 0.033                                  | 0.027   | 0.219    |
| rs58542926                            | 19   | 19379549        | TM6SF2       | T             | C            | 0.07                      | 0.289                        | 0.015   | 2.80E-85 | T                                  | C            | 0.05          | 0.326                       | 0.056   | 6.20E-09 | T                | 0.229                       | 0.045   | 3.36E-07 | 0.267                                  | 0.035   | 2.25E-14 |
| rs738408                              | 22   | 44324730        | PNPLA3       | T             | C            | 0.21                      | 0.195                        | 0.009   | 5.30E-95 | T                                  | C            | 0.24          | 0.278                       | 0.030   | 2.50E-20 | T                | 0.294                       | 0.024   | 1.35E-33 | 0.288                                  | 0.019   | 9.60E-53 |

Liver fat was measured by magnetic resonance imaging (MRI) in UK Biobank and by computed tomography (CT) imaging in the Framingham Heart Study (n=3284) and Multi-Ethnic Study of Atherosclerosis (MESA, n=4195). Effects of Framingham and MESA were combined via fixed-effects inverse variance weighted meta-analysis. Chr., chromosome; Freq., frequency; SD, standard deviation; SE, standard error.

**Supplementary Table 6. Effects of 8 common loci associated with quantitative liver fat on blood biomarkers of liver injury.**

| Lead Variant                        | Chr. | Position (hg19) | Nearest Gene  | Effect Allele | Other Allele | Effect Allele Freq. | Effect on liver fat (SD) | SE (SD) | P value | Effect on ALT (U/L) | SE (U/L) | P value | Effect on AST (U/L) | SE (U/L) | P value |
|-------------------------------------|------|-----------------|---------------|---------------|--------------|---------------------|--------------------------|---------|---------|---------------------|----------|---------|---------------------|----------|---------|
| <b>Newly-Identified Variants</b>    |      |                 |               |               |              |                     |                          |         |         |                     |          |         |                     |          |         |
| rs2642438                           | 1    | 220970028       | <i>MARC1</i>  | G             | A            | 0.70                | 0.052                    | 0.008   | 2E-09   | 0.47                | 0.036    | 1E-39   | 0.16                | 0.028    | 5E-09   |
| rs1229984                           | 4    | 100239319       | <i>ADH1B</i>  | C             | T            | 0.98                | 0.158                    | 0.025   | 7E-10   | 0.41                | 0.112    | 2E-04   | 0.32                | 0.086    | 2E-04   |
| rs112875651                         | 8    | 126506694       | <i>TRIB1</i>  | G             | A            | 0.61                | 0.050                    | 0.008   | 4E-10   | 0.56                | 0.034    | 2E-61   | 0.19                | 0.026    | 2E-13   |
| rs2250802                           | 10   | 113921354       | <i>GPAM</i>   | G             | A            | 0.27                | 0.054                    | 0.009   | 1E-09   | 0.41                | 0.037    | 3E-29   | 0.16                | 0.028    | 3E-08   |
| rs56252442                          | 19   | 18229208        | <i>MAST3</i>  | T             | G            | 0.25                | 0.049                    | 0.009   | 3E-08   | 0.29                | 0.038    | 1E-14   | 0.03                | 0.029    | 0.342   |
| <b>Previously-Reported Variants</b> |      |                 |               |               |              |                     |                          |         |         |                     |          |         |                     |          |         |
| rs58542926                          | 19   | 19379549        | <i>TM6SF2</i> | T             | C            | 0.07                | 0.289                    | 0.015   | 3E-85   | 1.28                | 0.062    | 2E-94   | 0.67                | 0.048    | 2E-44   |
| rs429358                            | 19   | 45411941        | <i>APOE</i>   | T             | C            | 0.85                | 0.121                    | 0.011   | 2E-29   | 0.66                | 0.045    | 7E-49   | 0.07                | 0.035    | 0.045   |
| rs738408                            | 22   | 44324730        | <i>PNPLA3</i> | T             | C            | 0.21                | 0.195                    | 0.009   | 5E-95   | 1.68                | 0.040    | <1E-300 | 1.06                | 0.031    | 8E-262  |

Effects on alanine aminotransferase (ALT, n=345,930 with ALT measurement) and aspartate aminotransferase (AST, n=344,799 with AST measurement) were measured in the n=362,910 subset of the UK Biobank who did not undergo abdominal imaging. Chr., chromosome; Freq., frequency; SD, standard deviation; SE, standard error.



**Supplementary Table 7. Effects of 8 common loci associated with quantitative liver fat on clinical diagnoses of liver disease.**

| Lead Variant                          | Chr. | Position (hg19) | Nearest Gene | Effect Allele | Other Allele | Effect Allele Freq. | UK Biobank                          |            |          | Mass General Brigham Biobank        |            |          | Combined UK Biobank + Mass General Brigham Biobank |            |          |
|---------------------------------------|------|-----------------|--------------|---------------|--------------|---------------------|-------------------------------------|------------|----------|-------------------------------------|------------|----------|----------------------------------------------------|------------|----------|
|                                       |      |                 |              |               |              |                     | Effect on NAFLD/NASH diagnosis (OR) | SE (logOR) | P value  | Effect on NAFLD/NASH diagnosis (OR) | SE (logOR) | P value  | Effect on NAFLD/NASH diagnosis (OR)                | SE (logOR) | P value  |
| <b>Newly-identified variants</b>      |      |                 |              |               |              |                     |                                     |            |          |                                     |            |          |                                                    |            |          |
| rs2642438                             | 1    | 220970028       | MARC1        | G             | A            | 0.70                | 1.14                                | 0.034      | 1.75E-04 | 1.06                                | 0.027      | 0.03     | 1.09                                               | 0.021      | 4.44E-05 |
| rs1229984                             | 4    | 100239319       | ADH1B        | C             | T            | 0.98                | 1.33                                | 0.118      | 0.015    | 1.26                                | 0.052      | 6.69E-06 | 1.28                                               | 0.048      | 3.36E-07 |
| rs112875651                           | 8    | 126506694       | TRIB1        | G             | A            | 0.61                | 1.10                                | 0.032      | 1.71E-03 | 1.07                                | 0.025      | 6.44E-03 | 1.08                                               | 0.020      | 4.35E-05 |
| rs2250802                             | 10   | 113921354       | GPAM         | G             | A            | 0.27                | 1.08                                | 0.033      | 0.016    | 1.07                                | 0.026      | 7.51E-03 | 1.08                                               | 0.021      | 3.24E-04 |
| rs56252442                            | 19   | 18229208        | MAST3        | T             | G            | 0.25                | 1.00                                | 0.035      | 0.991    | 1.04                                | 0.028      | 0.20     | 1.02                                               | 0.022      | 0.32     |
| <b>Previously-identified variants</b> |      |                 |              |               |              |                     |                                     |            |          |                                     |            |          |                                                    |            |          |
| rs429358                              | 19   | 45411941        | APOE         | T             | C            | 0.85                | 1.24                                | 0.045      | 1.39E-06 | 1.18                                | 0.036      | 5.24E-06 | 1.20                                               | 0.028      | 4.83E-11 |
| rs58542926                            | 19   | 19379549        | TM6SF2       | T             | C            | 0.07                | 1.41                                | 0.050      | 5.86E-12 | 1.38                                | 0.044      | 7.76E-13 | 1.39                                               | 0.033      | 3.13E-23 |
| rs738408                              | 22   | 44324730        | PNPLA3       | T             | C            | 0.21                | 1.52                                | 0.033      | 6.00E-37 | 1.38                                | 0.027      | 8.52E-32 | 1.43                                               | 0.021      | 9.80E-66 |

Effects on NAFLD/NASH in a subset of the UK Biobank who did not undergo abdominal imaging (2,225 cases vs 360,685 controls) and NAFLD/NASH in Mass General Brigham Biobank (4,129 cases vs 26,444 controls) were measured. Effects of UK Biobank and Mass General Brigham Biobank were combined via fixed-effects inverse variance weighted meta-analysis. Chr., chromosome; Freq., frequency; OR, odds ratio; SE, standard error.

**Supplementary Table 8. Rare inactivating variants in *APOB* are associated with decreased circulating lipids but increased markers of liver injury.**

|                                            | <i>APOB</i><br>inactivating<br>variant |                                 |               | <i>MTTP</i><br>inactivating<br>variant |                                 |               |
|--------------------------------------------|----------------------------------------|---------------------------------|---------------|----------------------------------------|---------------------------------|---------------|
|                                            | Controls<br>(N=42196)                  | carriers<br>(N=64) <sup>a</sup> | Adjusted<br>P | Controls<br>(N=42214) <sup>b</sup>     | carriers<br>(N=46) <sup>c</sup> | Adjusted<br>P |
| Apolipoprotein B, mean (SD), g/L           | 1.03 (0.235)                           | 0.619 (0.283)                   | 1.77E-29      | 1.03 (0.236)                           | 1.05 (0.212)                    | 0.66          |
| LDL cholesterol, mean (SD), mg/dL          | 146 (32.8)                             | 81.2 (37.1)                     | 4.48E-56      | 146 (32.9)                             | 154 (33.8)                      | 0.13          |
| Triglycerides, mean (SD), mg/dL            | 157 (93.6)                             | 94.5 (75.6)                     | 8.86E-08      | 157 (93.6)                             | 161 (59.6)                      | 0.91          |
| Alanine aminotransferase, mean (SD), U/L   | 23.5 (13.5)                            | 30.7 (18.1)                     | 1.73E-05      | 23.5 (13.5)                            | 27.7 (17.4)                     | 0.05          |
| Aspartate aminotransferase, mean (SD), U/L | 26.3 (10.3)                            | 29.9 (12.5)                     | 6.45E-03      | 26.3 (10.3)                            | 28.4 (11.2)                     | 0.21          |
| Coronary artery disease, N (%)             | 2727 (6.5%)                            | 1 (1.6%)                        | 0.15          | 2726 (6.5%)                            | 2 (4.3%)                        | 0.45          |

<sup>a</sup>Apolipoprotein B values were missing in 25/64 inactivating variant carriers (39%), all other measurements had <=6% missing in either group.

<sup>b</sup>Measurements were missing in 6.2-6.5% of controls.

<sup>c</sup>Measurements were missing in 4/46 inactivating variant carriers (8.7%).
